# Supplementary material
Source: PubMed Central journal article supplement (PMC3723711)
Supplement: NIHMS466870-supplement-04.pdf [file NIHMS466870-supplement-04.pdf]

**Table S1: State transition probabilities for CKD Stage 3a+, by race, sex, and age\***

| Age (x) | White Men            |                    | White Women          |                    | Black Men            |                    | Black Women          |                    |
|---------|----------------------|--------------------|----------------------|--------------------|----------------------|--------------------|----------------------|--------------------|
|         | Q <sub>noCKD,x</sub> | I <sub>CKD,x</sub> |
| 0       | 0.0061726            | 0.0000130          | 0.0050804            | 0.0000135          | 0.0144915            | 0.0000359          | 0.0119499            | 0.0000309          |
| 1       | 0.0004417            | 0.0000111          | 0.0003988            | 0.0000124          | 0.0007009            | 0.0000172          | 0.0006221            | 0.0000175          |
| 2       | 0.0002858            | 0.0000122          | 0.0002249            | 0.0000137          | 0.0004632            | 0.0000187          | 0.0004043            | 0.0000190          |
| 3       | 0.0002218            | 0.0000134          | 0.0001749            | 0.0000151          | 0.0003583            | 0.0000204          | 0.0002845            | 0.0000208          |
| 4       | 0.0001809            | 0.0000149          | 0.0001249            | 0.0000168          | 0.0002794            | 0.0000225          | 0.0002385            | 0.0000229          |
| 5       | 0.0001689            | 0.0000165          | 0.0001349            | 0.0000186          | 0.0002494            | 0.0000247          | 0.0002016            | 0.0000253          |
| 6       | 0.0001588            | 0.0000183          | 0.0001269            | 0.0000207          | 0.0002314            | 0.0000274          | 0.0001676            | 0.0000279          |
| 7       | 0.0001468            | 0.0000202          | 0.0001199            | 0.0000230          | 0.0002134            | 0.0000302          | 0.0001456            | 0.0000309          |
| 8       | 0.0001269            | 0.0000225          | 0.0001099            | 0.0000255          | 0.0001814            | 0.0000334          | 0.0001336            | 0.0000342          |
| 9       | 0.0001009            | 0.0000249          | 0.0000989            | 0.0000283          | 0.0001405            | 0.0000368          | 0.0001306            | 0.0000379          |
| 10      | 0.0000799            | 0.0000277          | 0.0000899            | 0.0000314          | 0.0001086            | 0.0000406          | 0.0001355            | 0.0000420          |
| 11      | 0.0000839            | 0.0000307          | 0.0000899            | 0.0000348          | 0.0001165            | 0.0000450          | 0.0001504            | 0.0000465          |
| 12      | 0.0001318            | 0.0000342          | 0.0001088            | 0.0000388          | 0.0001991            | 0.0000502          | 0.0001743            | 0.0000518          |
| 13      | 0.0002345            | 0.0000382          | 0.0001517            | 0.0000433          | 0.0003741            | 0.0000566          | 0.0002060            | 0.0000575          |
| 14      | 0.0003752            | 0.0000427          | 0.0002086            | 0.0000482          | 0.0006086            | 0.0000640          | 0.0002448            | 0.0000640          |
| 15      | 0.0005228            | 0.0000478          | 0.0002714            | 0.0000537          | 0.0008567            | 0.0000725          | 0.0002864            | 0.0000713          |
| 16      | 0.0006603            | 0.0000535          | 0.0003282            | 0.0000600          | 0.0010826            | 0.0000818          | 0.0003290            | 0.0000794          |
| 17      | 0.0007977            | 0.0000598          | 0.0003730            | 0.0000667          | 0.0012913            | 0.0000924          | 0.0003715            | 0.0000883          |
| 18      | 0.0009340            | 0.0000670          | 0.0004018            | 0.0000744          | 0.0014778            | 0.0001039          | 0.0004139            | 0.0000984          |
| 19      | 0.0010643            | 0.0000749          | 0.0004186            | 0.0000829          | 0.0016510            | 0.0001168          | 0.0004572            | 0.0001097          |
| 20      | 0.0012043            | 0.0000839          | 0.0004334            | 0.0000924          | 0.0018386            | 0.0001315          | 0.0005064            | 0.0001223          |
| 21      | 0.0013322            | 0.0000939          | 0.0004511            | 0.0001030          | 0.0020276            | 0.0001479          | 0.0005604            | 0.0001364          |
| 22      | 0.0014122            | 0.0001049          | 0.0004668            | 0.0001148          | 0.0021676            | 0.0001660          | 0.0006142            | 0.0001522          |
| 23      | 0.0014274            | 0.0001169          | 0.0004785            | 0.0001281          | 0.0022310            | 0.0001851          | 0.0006639            | 0.0001699          |
| 24      | 0.0013938            | 0.0001300          | 0.0004882            | 0.0001428          | 0.0022338            | 0.0002056          | 0.0007084            | 0.0001896          |
| 25      | 0.0013442            | 0.0001446          | 0.0004978            | 0.0001593          | 0.0022137            | 0.0002281          | 0.0007547            | 0.0002116          |
| 26      | 0.0013046            | 0.0001608          | 0.0005094            | 0.0001778          | 0.0022031            | 0.0002533          | 0.0008047            | 0.0002364          |
| 27      | 0.0012758            | 0.0001791          | 0.0005219            | 0.0001986          | 0.0022029            | 0.0002816          | 0.0008505            | 0.0002640          |
| 28      | 0.0012687            | 0.0001996          | 0.0005373            | 0.0002218          | 0.0022277            | 0.0003137          | 0.0008949            | 0.0002949          |
| 29      | 0.0012803            | 0.0002228          | 0.0005556            | 0.0002479          | 0.0022773            | 0.0003503          | 0.0009419            | 0.0003297          |
| 30      | 0.0012997            | 0.0002488          | 0.0005817            | 0.0002773          | 0.0023378            | 0.0003914          | 0.0009954            | 0.0003687          |
| 31      | 0.0013218            | 0.0002781          | 0.0006146            | 0.0003102          | 0.0024012            | 0.0004377          | 0.0010619            | 0.0004130          |
| 32      | 0.0013536            | 0.0003110          | 0.0006532            | 0.0003474          | 0.0025080            | 0.0004909          | 0.0011482            | 0.0004632          |
| 33      | 0.0013909            | 0.0003480          | 0.0006975            | 0.0003892          | 0.0025438            | 0.0005483          | 0.0012432            | 0.0005200          |
| 34      | 0.0014377            | 0.0003897          | 0.0007465            | 0.0004363          | 0.0026178            | 0.0006140          | 0.0013507            | 0.0005845          |
| 35      | 0.0014939            | 0.0004368          | 0.0007991            | 0.0004893          | 0.0027016            | 0.0006883          | 0.0014664            | 0.0006575          |
| 36      | 0.0015671            | 0.0004900          | 0.0008600            | 0.0005493          | 0.0028053            | 0.0007728          | 0.0015882            | 0.0007400          |
| 37      | 0.0016621            | 0.0005504          | 0.0009302            | 0.0006170          | 0.0029330            | 0.0008692          | 0.0017139            | 0.0008333          |
| 38      | 0.0017834            | 0.0006192          | 0.0010154            | 0.0006937          | 0.0030925            | 0.0009797          | 0.0018458            | 0.0009390          |
| 39      | 0.0019326            | 0.0006976          | 0.0011133            | 0.0007807          | 0.0032847            | 0.0011068          | 0.0019873            | 0.0010590          |
| 40      | 0.0020966            | 0.0007867          | 0.0012170            | 0.0008791          | 0.0034961            | 0.0012520          | 0.0021314            | 0.0011948          |

| Age (x) | White Men            |                    | White Women          |                    | Black Men            |                    | Black Women          |                    |
|---------|----------------------|--------------------|----------------------|--------------------|----------------------|--------------------|----------------------|--------------------|
|         | Q <sub>noCKD,x</sub> | I <sub>CKD,x</sub> |
| 41      | 0.0022740            | 0.0008879          | 0.0013290            | 0.0009906          | 0.0037284            | 0.0014179          | 0.0022886            | 0.0013494          |
| 42      | 0.0024768            | 0.0010036          | 0.0014548            | 0.0011173          | 0.0039958            | 0.0016092          | 0.0024828            | 0.0015276          |
| 43      | 0.0027024            | 0.0011357          | 0.0015958            | 0.0012615          | 0.0043025            | 0.0018304          | 0.0027198            | 0.0017335          |
| 44      | 0.0029413            | 0.0012862          | 0.0017438            | 0.0014251          | 0.0046398            | 0.0020852          | 0.0029875            | 0.0019708          |
| 45      | 0.0031832            | 0.0014573          | 0.0018946            | 0.0016109          | 0.0049757            | 0.0023748          | 0.0032560            | 0.0022406          |
| 46      | 0.0034281            | 0.0016518          | 0.0020446            | 0.0018214          | 0.0053258            | 0.0027063          | 0.0035168            | 0.0025466          |
| 47      | 0.0036930            | 0.0018743          | 0.0021953            | 0.0020604          | 0.0057460            | 0.0030945          | 0.0037834            | 0.0028953          |
| 48      | 0.0039872            | 0.0021295          | 0.0023496            | 0.0023319          | 0.0062636            | 0.0035541          | 0.0040597            | 0.0032935          |
| 49      | 0.0043106            | 0.0024228          | 0.0025110            | 0.0026409          | 0.0068622            | 0.0040952          | 0.0043449            | 0.0037481          |
| 50      | 0.0046581            | 0.0027594          | 0.0026849            | 0.0029930          | 0.0075043            | 0.0047244          | 0.0046435            | 0.0042682          |
| 51      | 0.0050107            | 0.0031439          | 0.0028677            | 0.0033942          | 0.0081361            | 0.0054428          | 0.0049382            | 0.0048593          |
| 52      | 0.0053554            | 0.0035816          | 0.0030517            | 0.0038504          | 0.0087340            | 0.0062565          | 0.0052054            | 0.0055247          |
| 53      | 0.0056785            | 0.0040775          | 0.0032326            | 0.0043684          | 0.0092577            | 0.0071643          | 0.0054255            | 0.0062678          |
| 54      | 0.0059841            | 0.0046400          | 0.0034147            | 0.0049573          | 0.0097093            | 0.0081755          | 0.0056061            | 0.0070978          |
| 55      | 0.0070048            | 0.0045638          | 0.0040377            | 0.0051855          | 0.0121557            | 0.0073145          | 0.0068728            | 0.0069331          |
| 56      | 0.0074487            | 0.0051695          | 0.0043140            | 0.0058671          | 0.0128843            | 0.0083144          | 0.0071915            | 0.0078390          |
| 57      | 0.0079271            | 0.0058583          | 0.0046325            | 0.0066417          | 0.0135684            | 0.0094386          | 0.0075195            | 0.0088631          |
| 58      | 0.0084543            | 0.0066431          | 0.0050032            | 0.0075224          | 0.0142075            | 0.0107003          | 0.0078734            | 0.0100225          |
| 59      | 0.0090276            | 0.0075366          | 0.0054233            | 0.0085235          | 0.0148352            | 0.0121212          | 0.0082672            | 0.0113369          |
| 60      | 0.0096493            | 0.0085538          | 0.0058893            | 0.0096602          | 0.0155114            | 0.0137339          | 0.0087132            | 0.0128285          |
| 61      | 0.0103037            | 0.0097095          | 0.0063789            | 0.0109470          | 0.0162544            | 0.0155672          | 0.0092052            | 0.0145176          |
| 62      | 0.0109822            | 0.0110202          | 0.0068742            | 0.0123996          | 0.0170080            | 0.0176318          | 0.0097240            | 0.0164220          |
| 63      | 0.0116867            | 0.0125052          | 0.0073667            | 0.0140345          | 0.0177034            | 0.0199286          | 0.0102230            | 0.0185498          |
| 64      | 0.0124366            | 0.0141886          | 0.0078753            | 0.0158744          | 0.0183076            | 0.0224633          | 0.0106833            | 0.0209133          |
| 65      | 0.0139992            | 0.0153983          | 0.0089786            | 0.0174348          | 0.0206849            | 0.0234300          | 0.0122667            | 0.0224067          |
| 66      | 0.0149632            | 0.0174258          | 0.0096313            | 0.0196583          | 0.0213733            | 0.0263129          | 0.0127790            | 0.0251524          |
| 67      | 0.0159864            | 0.0197072          | 0.0103170            | 0.0221389          | 0.0221097            | 0.0295179          | 0.0133192            | 0.0281925          |
| 68      | 0.0170253            | 0.0222594          | 0.0110120            | 0.0248921          | 0.0229075            | 0.0330743          | 0.0138947            | 0.0315475          |
| 69      | 0.0181111            | 0.0251121          | 0.0117496            | 0.0279429          | 0.0237569            | 0.0370017          | 0.0145181            | 0.0352389          |
| 70      | 0.0192892            | 0.0283009          | 0.0125762            | 0.0313205          | 0.0246144            | 0.0413005          | 0.0151825            | 0.0392788          |
| 71      | 0.0206381            | 0.0318743          | 0.0135377            | 0.0350573          | 0.0255254            | 0.0460053          | 0.0159181            | 0.0436913          |
| 72      | 0.0221711            | 0.0358699          | 0.0146341            | 0.0391738          | 0.0265629            | 0.0511708          | 0.0167617            | 0.0485051          |
| 73      | 0.0238698            | 0.0403156          | 0.0158565            | 0.0436846          | 0.0277243            | 0.0568137          | 0.0177121            | 0.0537283          |
| 74      | 0.0256811            | 0.0452218          | 0.0171908            | 0.0485970          | 0.0289505            | 0.0629072          | 0.0187417            | 0.0593462          |
| 75      | 0.0302958            | 0.0478969          | 0.0202004            | 0.0523602          | 0.0351022            | 0.0644912          | 0.0225838            | 0.0625847          |
| 76      | 0.0326421            | 0.0532973          | 0.0219539            | 0.0577963          | 0.0366592            | 0.0707811          | 0.0239380            | 0.0685442          |
| 77      | 0.0351203            | 0.0591323          | 0.0238337            | 0.0635863          | 0.0382664            | 0.0774017          | 0.0253634            | 0.0747918          |
| 78      | 0.0377388            | 0.0654006          | 0.0258505            | 0.0697164          | 0.0399333            | 0.0843257          | 0.0268698            | 0.0812999          |
| 79      | 0.0405064            | 0.0720951          | 0.0280158            | 0.0761681          | 0.0416710            | 0.0915229          | 0.0284662            | 0.0880368          |
| 80      | 0.0434353            | 0.0792035          | 0.0303457            | 0.0829206          | 0.0434901            | 0.0989586          | 0.0301652            | 0.0949706          |
| 81      | 0.0465397            | 0.0867091          | 0.0328573            | 0.0899521          | 0.0454043            | 0.1065985          | 0.0319788            | 0.1020689          |
| 82      | 0.0498351            | 0.0945913          | 0.0355688            | 0.0972398          | 0.0474261            | 0.1144069          | 0.0339202            | 0.1093012          |

| Age (x) | White Men     |             | White Women   |             | Black Men     |             | Black Women   |             |
|---------|---------------|-------------|---------------|-------------|---------------|-------------|---------------|-------------|
|         | $Q_{noCKD,x}$ | $I_{CKD,x}$ | $Q_{noCKD,x}$ | $I_{CKD,x}$ | $Q_{noCKD,x}$ | $I_{CKD,x}$ | $Q_{noCKD,x}$ | $I_{CKD,x}$ |
| 83      | 0.0533403     | 0.1028286   | 0.0385020     | 0.1047645   | 0.0495687     | 0.1223502   | 0.0360039     | 0.1166413   |
| 84      | 0.0570742     | 0.1113978   | 0.0416782     | 0.1125087   | 0.0518466     | 0.1303986   | 0.0382445     | 0.1240674   |
| 85      | 0.0610571     | 0.1202772   | 0.0451227     | 0.1204619   | 0.0542725     | 0.1385257   | 0.0406565     | 0.1315631   |
| 86      | 0.0653104     | 0.1294475   | 0.0488594     | 0.1286177   | 0.0568592     | 0.1467100   | 0.0432552     | 0.1391184   |
| 87      | 0.0698558     | 0.1388933   | 0.0529135     | 0.1369768   | 0.0596199     | 0.1549365   | 0.0460554     | 0.1467302   |
| 88      | 0.0747144     | 0.1486030   | 0.0573119     | 0.1455476   | 0.0625647     | 0.1631941   | 0.0490709     | 0.1544003   |
| 89      | 0.0799046     | 0.1585687   | 0.0620777     | 0.1543420   | 0.0657051     | 0.1714788   | 0.0523164     | 0.1621377   |
| 90      | 0.0854449     | 0.1687879   | 0.0672358     | 0.1633800   | 0.0690497     | 0.1797902   | 0.0558051     | 0.1699556   |

\* $Q_{noCKD,x}$ : the one-year probability of death among those without CKD at age x;  $I_{CKD,x}$ : the one-year probability of developing CKD among those without CKD at age x.
