# Supplementary material
Source: PubMed Central journal article supplement (PMC3723711)
Supplement: NIHMS466870-supplement-05.pdf [file NIHMS466870-supplement-05.pdf]

**Table S2: State transition probabilities for CKD Stage 3b+, by race, sex, and age\***

| Age (x) | White Men            |                    | White Women          |                    | Black Men            |                    | Black Women          |                    |
|---------|----------------------|--------------------|----------------------|--------------------|----------------------|--------------------|----------------------|--------------------|
|         | Q <sub>noCKD,x</sub> | I <sub>CKD,x</sub> |
| 0       | 0.0061726            | 0.0000047          | 0.0050804            | 0.0000038          | 0.0144915            | 0.0000257          | 0.0119499            | 0.0000201          |
| 1       | 0.0004417            | 0.0000026          | 0.0003988            | 0.0000023          | 0.0007009            | 0.0000086          | 0.0006221            | 0.0000076          |
| 2       | 0.0002858            | 0.0000028          | 0.0002249            | 0.0000025          | 0.0004632            | 0.0000091          | 0.0004043            | 0.0000080          |
| 3       | 0.0002218            | 0.0000031          | 0.0001749            | 0.0000027          | 0.0003583            | 0.0000098          | 0.0002845            | 0.0000087          |
| 4       | 0.0001809            | 0.0000033          | 0.0001249            | 0.0000030          | 0.0002794            | 0.0000106          | 0.0002385            | 0.0000094          |
| 5       | 0.0001689            | 0.0000036          | 0.0001349            | 0.0000032          | 0.0002494            | 0.0000116          | 0.0002016            | 0.0000103          |
| 6       | 0.0001588            | 0.0000040          | 0.0001269            | 0.0000036          | 0.0002314            | 0.0000126          | 0.0001676            | 0.0000112          |
| 7       | 0.0001468            | 0.0000044          | 0.0001199            | 0.0000040          | 0.0002134            | 0.0000138          | 0.0001456            | 0.0000122          |
| 8       | 0.0001269            | 0.0000048          | 0.0001099            | 0.0000044          | 0.0001814            | 0.0000150          | 0.0001336            | 0.0000134          |
| 9       | 0.0001009            | 0.0000053          | 0.0000989            | 0.0000048          | 0.0001405            | 0.0000164          | 0.0001306            | 0.0000148          |
| 10      | 0.0000799            | 0.0000058          | 0.0000899            | 0.0000053          | 0.0001086            | 0.0000179          | 0.0001355            | 0.0000162          |
| 11      | 0.0000839            | 0.0000064          | 0.0000899            | 0.0000058          | 0.0001165            | 0.0000197          | 0.0001504            | 0.0000178          |
| 12      | 0.0001318            | 0.0000071          | 0.0001088            | 0.0000065          | 0.0001991            | 0.0000219          | 0.0001743            | 0.0000197          |
| 13      | 0.0002345            | 0.0000079          | 0.0001517            | 0.0000072          | 0.0003741            | 0.0000248          | 0.0002060            | 0.0000218          |
| 14      | 0.0003752            | 0.0000090          | 0.0002086            | 0.0000080          | 0.0006086            | 0.0000283          | 0.0002448            | 0.0000242          |
| 15      | 0.0005228            | 0.0000101          | 0.0002714            | 0.0000090          | 0.0008567            | 0.0000324          | 0.0002864            | 0.0000268          |
| 16      | 0.0006603            | 0.0000114          | 0.0003282            | 0.0000101          | 0.0010826            | 0.0000369          | 0.0003290            | 0.0000296          |
| 17      | 0.0007977            | 0.0000128          | 0.0003730            | 0.0000113          | 0.0012913            | 0.0000417          | 0.0003715            | 0.0000329          |
| 18      | 0.0009340            | 0.0000144          | 0.0004018            | 0.0000125          | 0.0014778            | 0.0000471          | 0.0004139            | 0.0000365          |
| 19      | 0.0010643            | 0.0000162          | 0.0004186            | 0.0000140          | 0.0016510            | 0.0000531          | 0.0004572            | 0.0000404          |
| 20      | 0.0012043            | 0.0000183          | 0.0004334            | 0.0000156          | 0.0018386            | 0.0000599          | 0.0005064            | 0.0000449          |
| 21      | 0.0013322            | 0.0000206          | 0.0004511            | 0.0000174          | 0.0020276            | 0.0000675          | 0.0005604            | 0.0000499          |
| 22      | 0.0014122            | 0.0000230          | 0.0004668            | 0.0000194          | 0.0021676            | 0.0000756          | 0.0006142            | 0.0000556          |
| 23      | 0.0014274            | 0.0000256          | 0.0004785            | 0.0000217          | 0.0022310            | 0.0000838          | 0.0006639            | 0.0000618          |
| 24      | 0.0013938            | 0.0000282          | 0.0004882            | 0.0000242          | 0.0022338            | 0.0000924          | 0.0007084            | 0.0000687          |
| 25      | 0.0013442            | 0.0000310          | 0.0004978            | 0.0000270          | 0.0022137            | 0.0001014          | 0.0007547            | 0.0000763          |
| 26      | 0.0013046            | 0.0000343          | 0.0005094            | 0.0000303          | 0.0022031            | 0.0001115          | 0.0008047            | 0.0000850          |
| 27      | 0.0012758            | 0.0000379          | 0.0005219            | 0.0000340          | 0.0022029            | 0.0001229          | 0.0008505            | 0.0000946          |
| 28      | 0.0012687            | 0.0000421          | 0.0005373            | 0.0000381          | 0.0022277            | 0.0001358          | 0.0008949            | 0.0001053          |
| 29      | 0.0012803            | 0.0000468          | 0.0005556            | 0.0000428          | 0.0022773            | 0.0001507          | 0.0009419            | 0.0001173          |
| 30      | 0.0012997            | 0.0000522          | 0.0005817            | 0.0000484          | 0.0023378            | 0.0001674          | 0.0009954            | 0.0001309          |
| 31      | 0.0013218            | 0.0000583          | 0.0006146            | 0.0000546          | 0.0024012            | 0.0001862          | 0.0010619            | 0.0001464          |
| 32      | 0.0013536            | 0.0000653          | 0.0006532            | 0.0000617          | 0.0025080            | 0.0002083          | 0.0011482            | 0.0001641          |
| 33      | 0.0013909            | 0.0000732          | 0.0006975            | 0.0000699          | 0.0025438            | 0.0002310          | 0.0012432            | 0.0001845          |
| 34      | 0.0014377            | 0.0000823          | 0.0007465            | 0.0000793          | 0.0026178            | 0.0002574          | 0.0013507            | 0.0002078          |
| 35      | 0.0014939            | 0.0000925          | 0.0007991            | 0.0000901          | 0.0027016            | 0.0002874          | 0.0014664            | 0.0002343          |
| 36      | 0.0015671            | 0.0001045          | 0.0008600            | 0.0001026          | 0.0028053            | 0.0003218          | 0.0015882            | 0.0002645          |
| 37      | 0.0016621            | 0.0001183          | 0.0009302            | 0.0001170          | 0.0029330            | 0.0003612          | 0.0017139            | 0.0002989          |
| 38      | 0.0017834            | 0.0001344          | 0.0010154            | 0.0001338          | 0.0030925            | 0.0004072          | 0.0018458            | 0.0003381          |
| 39      | 0.0019326            | 0.0001534          | 0.0011133            | 0.0001533          | 0.0032847            | 0.0004607          | 0.0019873            | 0.0003830          |
| 40      | 0.0020966            | 0.0001753          | 0.0012170            | 0.0001760          | 0.0034961            | 0.0005222          | 0.0021314            | 0.0004341          |

| Age (x) | White Men            |                    | White Women          |                    | Black Men            |                    | Black Women          |                    |
|---------|----------------------|--------------------|----------------------|--------------------|----------------------|--------------------|----------------------|--------------------|
|         | Q <sub>noCKD,x</sub> | I <sub>CKD,x</sub> |
| 41      | 0.0022740            | 0.0002008          | 0.0013290            | 0.0002023          | 0.0037284            | 0.0005931          | 0.0022886            | 0.0004930          |
| 42      | 0.0024768            | 0.0002306          | 0.0014548            | 0.0002330          | 0.0039958            | 0.0006762          | 0.0024828            | 0.0005623          |
| 43      | 0.0027024            | 0.0002656          | 0.0015958            | 0.0002689          | 0.0043025            | 0.0007736          | 0.0027198            | 0.0006445          |
| 44      | 0.0029413            | 0.0003063          | 0.0017438            | 0.0003108          | 0.0046398            | 0.0008872          | 0.0029875            | 0.0007409          |
| 45      | 0.0031832            | 0.0003534          | 0.0018946            | 0.0003594          | 0.0049757            | 0.0010169          | 0.0032560            | 0.0008516          |
| 46      | 0.0034281            | 0.0004079          | 0.0020446            | 0.0004158          | 0.0053258            | 0.0011666          | 0.0035168            | 0.0009780          |
| 47      | 0.0036930            | 0.0004717          | 0.0021953            | 0.0004814          | 0.0057460            | 0.0013457          | 0.0037834            | 0.0011237          |
| 48      | 0.0039872            | 0.0005470          | 0.0023496            | 0.0005576          | 0.0062636            | 0.0015636          | 0.0040597            | 0.0012922          |
| 49      | 0.0043106            | 0.0006359          | 0.0025110            | 0.0006467          | 0.0068622            | 0.0018257          | 0.0043449            | 0.0014872          |
| 50      | 0.0046581            | 0.0007404          | 0.0026849            | 0.0007511          | 0.0075043            | 0.0021356          | 0.0046435            | 0.0017135          |
| 51      | 0.0050107            | 0.0008625          | 0.0028677            | 0.0008732          | 0.0081361            | 0.0024923          | 0.0049382            | 0.0019734          |
| 52      | 0.0053554            | 0.0010041          | 0.0030517            | 0.0010154          | 0.0087340            | 0.0028985          | 0.0052054            | 0.0022678          |
| 53      | 0.0056785            | 0.0011672          | 0.0032326            | 0.0011810          | 0.0092577            | 0.0033521          | 0.0054255            | 0.0025968          |
| 54      | 0.0059841            | 0.0013555          | 0.0034147            | 0.0013738          | 0.0097093            | 0.0038579          | 0.0056061            | 0.0029652          |
| 55      | 0.0070048            | 0.0011963          | 0.0040377            | 0.0013538          | 0.0121557            | 0.0030727          | 0.0068728            | 0.0026271          |
| 56      | 0.0074487            | 0.0013815          | 0.0043140            | 0.0015672          | 0.0128843            | 0.0035207          | 0.0071915            | 0.0029940          |
| 57      | 0.0079271            | 0.0015969          | 0.0046325            | 0.0018160          | 0.0135684            | 0.0040256          | 0.0075195            | 0.0034130          |
| 58      | 0.0084543            | 0.0018485          | 0.0050032            | 0.0021064          | 0.0142075            | 0.0045937          | 0.0078734            | 0.0038934          |
| 59      | 0.0090276            | 0.0021420          | 0.0054233            | 0.0024453          | 0.0148352            | 0.0052378          | 0.0082672            | 0.0044462          |
| 60      | 0.0096493            | 0.0024845          | 0.0058893            | 0.0028398          | 0.0155114            | 0.0059782          | 0.0087132            | 0.0050839          |
| 61      | 0.0103037            | 0.0028827          | 0.0063789            | 0.0032968          | 0.0162544            | 0.0068328          | 0.0092052            | 0.0058177          |
| 62      | 0.0109822            | 0.0033443          | 0.0068742            | 0.0038233          | 0.0170080            | 0.0078052          | 0.0097240            | 0.0066563          |
| 63      | 0.0116867            | 0.0038792          | 0.0073667            | 0.0044275          | 0.0177034            | 0.0088919          | 0.0102230            | 0.0076010          |
| 64      | 0.0124366            | 0.0045004          | 0.0078753            | 0.0051215          | 0.0183076            | 0.0100928          | 0.0106833            | 0.0086562          |
| 65      | 0.0139992            | 0.0047036          | 0.0089786            | 0.0055329          | 0.0206849            | 0.0097852          | 0.0122667            | 0.0088215          |
| 66      | 0.0149632            | 0.0054346          | 0.0096313            | 0.0063643          | 0.0213733            | 0.0110519          | 0.0127790            | 0.0099811          |
| 67      | 0.0159864            | 0.0062752          | 0.0103170            | 0.0073073          | 0.0221097            | 0.0124754          | 0.0133192            | 0.0112759          |
| 68      | 0.0170253            | 0.0072335          | 0.0110120            | 0.0083692          | 0.0229075            | 0.0140744          | 0.0138947            | 0.0127171          |
| 69      | 0.0181111            | 0.0083269          | 0.0117496            | 0.0095641          | 0.0237569            | 0.0158612          | 0.0145181            | 0.0143177          |
| 70      | 0.0192892            | 0.0095774          | 0.0125762            | 0.0109104          | 0.0246144            | 0.0178343          | 0.0151825            | 0.0160839          |
| 71      | 0.0206381            | 0.0110182          | 0.0135377            | 0.0124298          | 0.0255254            | 0.0200203          | 0.0159181            | 0.0180338          |
| 72      | 0.0221711            | 0.0126760          | 0.0146341            | 0.0141374          | 0.0265629            | 0.0224635          | 0.0167617            | 0.0201909          |
| 73      | 0.0238698            | 0.0145734          | 0.0158565            | 0.0160456          | 0.0277243            | 0.0251821          | 0.0177121            | 0.0225649          |
| 74      | 0.0256811            | 0.0167230          | 0.0171908            | 0.0181633          | 0.0289505            | 0.0281621          | 0.0187417            | 0.0251495          |
| 75      | 0.0302958            | 0.0166778          | 0.0202004            | 0.0189286          | 0.0351022            | 0.0267018          | 0.0225838            | 0.0251886          |
| 76      | 0.0326421            | 0.0189152          | 0.0219539            | 0.0211823          | 0.0366592            | 0.0295115          | 0.0239380            | 0.0277543          |
| 77      | 0.0351203            | 0.0213880          | 0.0238337            | 0.0236178          | 0.0382664            | 0.0324984          | 0.0253634            | 0.0304612          |
| 78      | 0.0377388            | 0.0241081          | 0.0258505            | 0.0262374          | 0.0399333            | 0.0356571          | 0.0268698            | 0.0333030          |
| 79      | 0.0405064            | 0.0270862          | 0.0280158            | 0.0290433          | 0.0416710            | 0.0389821          | 0.0284662            | 0.0362730          |
| 80      | 0.0434353            | 0.0303328          | 0.0303457            | 0.0320392          | 0.0434901            | 0.0424677          | 0.0301652            | 0.0393680          |
| 81      | 0.0465397            | 0.0338591          | 0.0328573            | 0.0352318          | 0.0454043            | 0.0461106          | 0.0319788            | 0.0425864          |
| 82      | 0.0498351            | 0.0376760          | 0.0355688            | 0.0386302          | 0.0474261            | 0.0499085          | 0.0339202            | 0.0459314          |

| Age (x) | White Men            |                    | White Women          |                    | Black Men            |                    | Black Women          |                    |
|---------|----------------------|--------------------|----------------------|--------------------|----------------------|--------------------|----------------------|--------------------|
|         | Q <sub>noCKD,x</sub> | I <sub>CKD,x</sub> |
| 83      | 0.0533403            | 0.0417969          | 0.0385020            | 0.0422492          | 0.0495687            | 0.0538622          | 0.0360039            | 0.0494112          |
| 84      | 0.0570742            | 0.0462365          | 0.0416782            | 0.0461075          | 0.0518466            | 0.0579764          | 0.0382445            | 0.0530384          |
| 85      | 0.0610571            | 0.0510121          | 0.0451227            | 0.0502313          | 0.0542725            | 0.0622584          | 0.0406565            | 0.0568306          |
| 86      | 0.0653104            | 0.0561444          | 0.0488594            | 0.0546511          | 0.0568592            | 0.0667191          | 0.0432552            | 0.0608105          |
| 87      | 0.0698558            | 0.0616568          | 0.0529135            | 0.0594036          | 0.0596199            | 0.0713731          | 0.0460554            | 0.0650050          |
| 88      | 0.0747144            | 0.0675757          | 0.0573119            | 0.0645310          | 0.0625647            | 0.0762358          | 0.0490709            | 0.0694428          |
| 89      | 0.0799046            | 0.0739283          | 0.0620777            | 0.0700770          | 0.0657051            | 0.0813262          | 0.0523164            | 0.0741567          |
| 90      | 0.0854449            | 0.0807442          | 0.0672358            | 0.0760899          | 0.0690497            | 0.0866630          | 0.0558051            | 0.0791794          |
