# Supplementary material
Source: PubMed Central journal article supplement (PMC3723711)
Supplement: NIHMS466870-supplement-06.pdf [file NIHMS466870-supplement-06.pdf]

**Table S3: State transition probabilities for CKD Stage 4+, by race, sex, and age\***

| Age (x) | White Men            |                    | White Women          |                    | Black Men            |                    | Black Women          |                    |
|---------|----------------------|--------------------|----------------------|--------------------|----------------------|--------------------|----------------------|--------------------|
|         | Q <sub>noCKD,x</sub> | I <sub>CKD,x</sub> |
| 0       | 0.0061750            | 0.0000019          | 0.0050822            | 0.0000017          | 0.0145035            | 0.0000128          | 0.0119581            | 0.0000112          |
| 1       | 0.0004419            | 0.0000010          | 0.0003989            | 0.0000010          | 0.0007015            | 0.0000043          | 0.0006226            | 0.0000043          |
| 2       | 0.0002859            | 0.0000011          | 0.0002250            | 0.0000011          | 0.0004636            | 0.0000045          | 0.0004047            | 0.0000044          |
| 3       | 0.0002220            | 0.0000012          | 0.0001750            | 0.0000012          | 0.0003587            | 0.0000049          | 0.0002848            | 0.0000048          |
| 4       | 0.0001810            | 0.0000014          | 0.0001250            | 0.0000013          | 0.0002797            | 0.0000052          | 0.0002388            | 0.0000052          |
| 5       | 0.0001690            | 0.0000015          | 0.0001350            | 0.0000014          | 0.0002497            | 0.0000058          | 0.0002018            | 0.0000057          |
| 6       | 0.0001590            | 0.0000016          | 0.0001270            | 0.0000016          | 0.0002317            | 0.0000063          | 0.0001678            | 0.0000062          |
| 7       | 0.0001470            | 0.0000018          | 0.0001200            | 0.0000018          | 0.0002137            | 0.0000070          | 0.0001458            | 0.0000069          |
| 8       | 0.0001270            | 0.0000020          | 0.0001100            | 0.0000020          | 0.0001817            | 0.0000076          | 0.0001338            | 0.0000075          |
| 9       | 0.0001010            | 0.0000021          | 0.0000990            | 0.0000021          | 0.0001408            | 0.0000083          | 0.0001308            | 0.0000083          |
| 10      | 0.0000800            | 0.0000024          | 0.0000900            | 0.0000024          | 0.0001088            | 0.0000091          | 0.0001358            | 0.0000091          |
| 11      | 0.0000840            | 0.0000026          | 0.0000900            | 0.0000026          | 0.0001168            | 0.0000100          | 0.0001507            | 0.0000100          |
| 12      | 0.0001319            | 0.0000029          | 0.0001089            | 0.0000029          | 0.0001996            | 0.0000112          | 0.0001746            | 0.0000110          |
| 13      | 0.0002349            | 0.0000032          | 0.0001519            | 0.0000032          | 0.0003752            | 0.0000127          | 0.0002065            | 0.0000123          |
| 14      | 0.0003758            | 0.0000037          | 0.0002089            | 0.0000036          | 0.0006105            | 0.0000145          | 0.0002454            | 0.0000135          |
| 15      | 0.0005236            | 0.0000042          | 0.0002718            | 0.0000039          | 0.0008597            | 0.0000167          | 0.0002872            | 0.0000151          |
| 16      | 0.0006615            | 0.0000047          | 0.0003287            | 0.0000044          | 0.0010868            | 0.0000191          | 0.0003300            | 0.0000167          |
| 17      | 0.0007993            | 0.0000054          | 0.0003737            | 0.0000049          | 0.0012968            | 0.0000217          | 0.0003728            | 0.0000185          |
| 18      | 0.0009361            | 0.0000061          | 0.0004026            | 0.0000055          | 0.0014847            | 0.0000246          | 0.0004155            | 0.0000206          |
| 19      | 0.0010669            | 0.0000068          | 0.0004196            | 0.0000061          | 0.0016594            | 0.0000277          | 0.0004592            | 0.0000228          |
| 20      | 0.0012076            | 0.0000077          | 0.0004345            | 0.0000067          | 0.0018489            | 0.0000314          | 0.0005088            | 0.0000253          |
| 21      | 0.0013363            | 0.0000087          | 0.0004524            | 0.0000075          | 0.0020402            | 0.0000355          | 0.0005633            | 0.0000282          |
| 22      | 0.0014170            | 0.0000097          | 0.0004684            | 0.0000083          | 0.0021825            | 0.0000399          | 0.0006178            | 0.0000314          |
| 23      | 0.0014328            | 0.0000108          | 0.0004803            | 0.0000092          | 0.0022479            | 0.0000444          | 0.0006681            | 0.0000348          |
| 24      | 0.0013996            | 0.0000118          | 0.0004902            | 0.0000102          | 0.0022526            | 0.0000489          | 0.0007135            | 0.0000387          |
| 25      | 0.0013505            | 0.0000131          | 0.0005001            | 0.0000113          | 0.0022343            | 0.0000539          | 0.0007607            | 0.0000430          |
| 26      | 0.0013113            | 0.0000144          | 0.0005120            | 0.0000126          | 0.0022257            | 0.0000594          | 0.0008117            | 0.0000478          |
| 27      | 0.0012831            | 0.0000158          | 0.0005248            | 0.0000140          | 0.0022279            | 0.0000655          | 0.0008587            | 0.0000532          |
| 28      | 0.0012768            | 0.0000176          | 0.0005407            | 0.0000156          | 0.0022557            | 0.0000726          | 0.0009046            | 0.0000590          |
| 29      | 0.0012894            | 0.0000195          | 0.0005595            | 0.0000173          | 0.0023090            | 0.0000806          | 0.0009532            | 0.0000657          |
| 30      | 0.0013100            | 0.0000217          | 0.0005862            | 0.0000194          | 0.0023738            | 0.0000898          | 0.0010086            | 0.0000731          |
| 31      | 0.0013335            | 0.0000242          | 0.0006199            | 0.0000216          | 0.0024422            | 0.0000999          | 0.0010776            | 0.0000816          |
| 32      | 0.0013668            | 0.0000269          | 0.0006596            | 0.0000242          | 0.0025555            | 0.0001120          | 0.0011670            | 0.0000914          |
| 33      | 0.0014061            | 0.0000302          | 0.0007051            | 0.0000271          | 0.0025972            | 0.0001243          | 0.0012658            | 0.0001024          |
| 34      | 0.0014553            | 0.0000337          | 0.0007556            | 0.0000304          | 0.0026787            | 0.0001388          | 0.0013780            | 0.0001151          |
| 35      | 0.0015143            | 0.0000377          | 0.0008099            | 0.0000342          | 0.0027713            | 0.0001550          | 0.0014994            | 0.0001294          |
| 36      | 0.0015910            | 0.0000424          | 0.0008731            | 0.0000385          | 0.0028856            | 0.0001737          | 0.0016280            | 0.0001456          |
| 37      | 0.0016904            | 0.0000478          | 0.0009461            | 0.0000433          | 0.0030263            | 0.0001951          | 0.0017616            | 0.0001641          |
| 38      | 0.0018174            | 0.0000541          | 0.0010349            | 0.0000490          | 0.0032018            | 0.0002201          | 0.0019031            | 0.0001849          |
| 39      | 0.0019738            | 0.0000614          | 0.0011373            | 0.0000554          | 0.0034136            | 0.0002492          | 0.0020561            | 0.0002087          |
| 40      | 0.0021466            | 0.0000698          | 0.0012465            | 0.0000629          | 0.0036486            | 0.0002827          | 0.0022136            | 0.0002356          |

| Age (x) | White Men            |                    | White Women          |                    | Black Men            |                    | Black Women          |                    |
|---------|----------------------|--------------------|----------------------|--------------------|----------------------|--------------------|----------------------|--------------------|
|         | Q <sub>noCKD,x</sub> | I <sub>CKD,x</sub> |
| 41      | 0.0023348            | 0.0000795          | 0.0013652            | 0.0000714          | 0.0039092            | 0.0003215          | 0.0023870            | 0.0002666          |
| 42      | 0.0025511            | 0.0000909          | 0.0014994            | 0.0000812          | 0.0042112            | 0.0003668          | 0.0026019            | 0.0003029          |
| 43      | 0.0027933            | 0.0001041          | 0.0016509            | 0.0000927          | 0.0045605            | 0.0004201          | 0.0028654            | 0.0003460          |
| 44      | 0.0030523            | 0.0001194          | 0.0018116            | 0.0001058          | 0.0049492            | 0.0004823          | 0.0031659            | 0.0003965          |
| 45      | 0.0033180            | 0.0001370          | 0.0019776            | 0.0001208          | 0.0053448            | 0.0005534          | 0.0034731            | 0.0004542          |
| 46      | 0.0035913            | 0.0001572          | 0.0021457            | 0.0001381          | 0.0057654            | 0.0006356          | 0.0037786            | 0.0005197          |
| 47      | 0.0038905            | 0.0001806          | 0.0023178            | 0.0001578          | 0.0062736            | 0.0007343          | 0.0040979            | 0.0005949          |
| 48      | 0.0042270            | 0.0002082          | 0.0024975            | 0.0001806          | 0.0069035            | 0.0008549          | 0.0044365            | 0.0006815          |
| 49      | 0.0046023            | 0.0002406          | 0.0026895            | 0.0002069          | 0.0076421            | 0.0010010          | 0.0047952            | 0.0007812          |
| 50      | 0.0050127            | 0.0002787          | 0.0029005            | 0.0002374          | 0.0084527            | 0.0011741          | 0.0051809            | 0.0008968          |
| 51      | 0.0054400            | 0.0003227          | 0.0031279            | 0.0002728          | 0.0092794            | 0.0013740          | 0.0055762            | 0.0010290          |
| 52      | 0.0058719            | 0.0003733          | 0.0033646            | 0.0003136          | 0.0100982            | 0.0016021          | 0.0059558            | 0.0011775          |
| 53      | 0.0062951            | 0.0004311          | 0.0036072            | 0.0003606          | 0.0108641            | 0.0018569          | 0.0062980            | 0.0013418          |
| 54      | 0.0067158            | 0.0004972          | 0.0038619            | 0.0004149          | 0.0115799            | 0.0021410          | 0.0066111            | 0.0015241          |
| 55      | 0.0073044            | 0.0004234          | 0.0042177            | 0.0003888          | 0.0130783            | 0.0017071          | 0.0073429            | 0.0013132          |
| 56      | 0.0078091            | 0.0004837          | 0.0045324            | 0.0004441          | 0.0139758            | 0.0019524          | 0.0077431            | 0.0014832          |
| 57      | 0.0083612            | 0.0005534          | 0.0048990            | 0.0005083          | 0.0148508            | 0.0022267          | 0.0081659            | 0.0016755          |
| 58      | 0.0089781            | 0.0006342          | 0.0053302            | 0.0005831          | 0.0157050            | 0.0025330          | 0.0086315            | 0.0018942          |
| 59      | 0.0096606            | 0.0007278          | 0.0058258            | 0.0006701          | 0.0165778            | 0.0028782          | 0.0091583            | 0.0021448          |
| 60      | 0.0104148            | 0.0008364          | 0.0063856            | 0.0007713          | 0.0175404            | 0.0032746          | 0.0097636            | 0.0024333          |
| 61      | 0.0112283            | 0.0009617          | 0.0069887            | 0.0008881          | 0.0186197            | 0.0037318          | 0.0104451            | 0.0027647          |
| 62      | 0.0120964            | 0.0011059          | 0.0076194            | 0.0010217          | 0.0197584            | 0.0042506          | 0.0111857            | 0.0031420          |
| 63      | 0.0130264            | 0.0012719          | 0.0082712            | 0.0011740          | 0.0208810            | 0.0048263          | 0.0119356            | 0.0035633          |
| 64      | 0.0140462            | 0.0014640          | 0.0089692            | 0.0013485          | 0.0219495            | 0.0054567          | 0.0126746            | 0.0040286          |
| 65      | 0.0157992            | 0.0011230          | 0.0101704            | 0.0011703          | 0.0260236            | 0.0031291          | 0.0152415            | 0.0027423          |
| 66      | 0.0171200            | 0.0012802          | 0.0110664            | 0.0013301          | 0.0274475            | 0.0035092          | 0.0161964            | 0.0030587          |
| 67      | 0.0185673            | 0.0014600          | 0.0120404            | 0.0015105          | 0.0290170            | 0.0039354          | 0.0172397            | 0.0034087          |
| 68      | 0.0200999            | 0.0016641          | 0.0130706            | 0.0017130          | 0.0307598            | 0.0044139          | 0.0183872            | 0.0037953          |
| 69      | 0.0217643            | 0.0018966          | 0.0142032            | 0.0019410          | 0.0326730            | 0.0049496          | 0.0196620            | 0.0042225          |
| 70      | 0.0236278            | 0.0021630          | 0.0155030            | 0.0021990          | 0.0347053            | 0.0055443          | 0.0210622            | 0.0046934          |
| 71      | 0.0258042            | 0.0024724          | 0.0170404            | 0.0024935          | 0.0369266            | 0.0062080          | 0.0226369            | 0.0052145          |
| 72      | 0.0283337            | 0.0028329          | 0.0188317            | 0.0028299          | 0.0394536            | 0.0069575          | 0.0244486            | 0.0057958          |
| 73      | 0.0312190            | 0.0032520          | 0.0208832            | 0.0032136          | 0.0422981            | 0.0078037          | 0.0265080            | 0.0064444          |
| 74      | 0.0344152            | 0.0037355          | 0.0231934            | 0.0036502          | 0.0453825            | 0.0087479          | 0.0287846            | 0.0071646          |
| 75      | 0.0376290            | 0.0045852          | 0.0255402            | 0.0043928          | 0.0461293            | 0.0122815          | 0.0294867            | 0.0097276          |
| 76      | 0.0413321            | 0.0052239          | 0.0283086            | 0.0049660          | 0.0490867            | 0.0135595          | 0.0318316            | 0.0107349          |
| 77      | 0.0453677            | 0.0059437          | 0.0313568            | 0.0056081          | 0.0522164            | 0.0149289          | 0.0343508            | 0.0118210          |
| 78      | 0.0497624            | 0.0067530          | 0.0347104            | 0.0063271          | 0.0555319            | 0.0163914          | 0.0370602            | 0.0129915          |
| 79      | 0.0545432            | 0.0076605          | 0.0383957            | 0.0071320          | 0.0590491            | 0.0179489          | 0.0399746            | 0.0142515          |
| 80      | 0.0597405            | 0.0086755          | 0.0424445            | 0.0080331          | 0.0627829            | 0.0196033          | 0.0431130            | 0.0156084          |
| 81      | 0.0653869            | 0.0098081          | 0.0468905            | 0.0090422          | 0.0667528            | 0.0213571          | 0.0464945            | 0.0170703          |
| 82      | 0.0715155            | 0.0110679          | 0.0517679            | 0.0101720          | 0.0709767            | 0.0232131          | 0.0501391            | 0.0186463          |

| Age (x) | White Men            |                    | White Women          |                    | Black Men            |                    | Black Women          |                    |
|---------|----------------------|--------------------|----------------------|--------------------|----------------------|--------------------|----------------------|--------------------|
|         | Q <sub>noCKD,x</sub> | I <sub>CKD,x</sub> |
| 83      | 0.0781635            | 0.0124659          | 0.0571162            | 0.0114372          | 0.0754741            | 0.0251744          | 0.0540697            | 0.0203472          |
| 84      | 0.0853671            | 0.0140122          | 0.0629738            | 0.0128531          | 0.0802670            | 0.0272446          | 0.0583094            | 0.0221843          |
| 85      | 0.0931644            | 0.0157175          | 0.0693854            | 0.0144365          | 0.0853754            | 0.0294272          | 0.0628816            | 0.0241694          |
| 86      | 0.1015942            | 0.0175919          | 0.0763930            | 0.0162050          | 0.0908202            | 0.0317259          | 0.0678110            | 0.0263152          |
| 87      | 0.1106954            | 0.0196448          | 0.0840413            | 0.0181767          | 0.0966236            | 0.0341443          | 0.0731225            | 0.0286343          |
| 88      | 0.1205061            | 0.0218854          | 0.0923776            | 0.0203703          | 0.1028036            | 0.0366849          | 0.0788394            | 0.0311389          |
| 89      | 0.1310600            | 0.0243211          | 0.1014431            | 0.0228038          | 0.1093811            | 0.0393505          | 0.0849868            | 0.0338414          |
| 90      | 0.1423906            | 0.0269584          | 0.1112825            | 0.0254955          | 0.1163731            | 0.0421429          | 0.0915881            | 0.0367535          |
