# Supplementary material
Source: PubMed Central journal article supplement (PMC3723711)
Supplement: NIHMS466870-supplement-07.pdf [file NIHMS466870-supplement-07.pdf]

**Table S4: State transition probabilities for ESRD, by race, sex, and age\***

| Age (x) | White Men            |                    | White Women          |                    | Black Men            |                    | Black Women          |                    |
|---------|----------------------|--------------------|----------------------|--------------------|----------------------|--------------------|----------------------|--------------------|
|         | Q <sub>noCKD,x</sub> | I <sub>CKD,x</sub> |
| 0       | 0.0061756            | 0.0000130          | 0.0050828            | 0.0000080          | 0.0145123            | 0.0000160          | 0.0119657            | 0.0000060          |
| 1       | 0.0004416            | 0.0000130          | 0.0003988            | 0.0000080          | 0.0007013            | 0.0000160          | 0.0006227            | 0.0000060          |
| 2       | 0.0002856            | 0.0000130          | 0.0002248            | 0.0000080          | 0.0004633            | 0.0000160          | 0.0004047            | 0.0000060          |
| 3       | 0.0002216            | 0.0000130          | 0.0001748            | 0.0000080          | 0.0003583            | 0.0000160          | 0.0002847            | 0.0000060          |
| 4       | 0.0001806            | 0.0000130          | 0.0001248            | 0.0000080          | 0.0002793            | 0.0000160          | 0.0002387            | 0.0000060          |
| 5       | 0.0001684            | 0.0000060          | 0.0001346            | 0.0000060          | 0.0002488            | 0.0000070          | 0.0002013            | 0.0000040          |
| 6       | 0.0001584            | 0.0000060          | 0.0001266            | 0.0000060          | 0.0002308            | 0.0000070          | 0.0001673            | 0.0000040          |
| 7       | 0.0001464            | 0.0000060          | 0.0001196            | 0.0000060          | 0.0002128            | 0.0000070          | 0.0001453            | 0.0000040          |
| 8       | 0.0001264            | 0.0000060          | 0.0001096            | 0.0000060          | 0.0001808            | 0.0000070          | 0.0001333            | 0.0000040          |
| 9       | 0.0001004            | 0.0000060          | 0.0000986            | 0.0000060          | 0.0001398            | 0.0000070          | 0.0001303            | 0.0000040          |
| 10      | 0.0000790            | 0.0000130          | 0.0000892            | 0.0000130          | 0.0001068            | 0.0000160          | 0.0001344            | 0.0000120          |
| 11      | 0.0000830            | 0.0000130          | 0.0000892            | 0.0000130          | 0.0001148            | 0.0000160          | 0.0001494            | 0.0000120          |
| 12      | 0.0001310            | 0.0000130          | 0.0001082            | 0.0000130          | 0.0001978            | 0.0000160          | 0.0001734            | 0.0000120          |
| 13      | 0.0002340            | 0.0000130          | 0.0001512            | 0.0000130          | 0.0003738            | 0.0000160          | 0.0002054            | 0.0000120          |
| 14      | 0.0003750            | 0.0000130          | 0.0002082            | 0.0000130          | 0.0006098            | 0.0000160          | 0.0002444            | 0.0000120          |
| 15      | 0.0005221            | 0.0000290          | 0.0002704            | 0.0000220          | 0.0008569            | 0.0000430          | 0.0002835            | 0.0000400          |
| 16      | 0.0006601            | 0.0000290          | 0.0003274            | 0.0000220          | 0.0010849            | 0.0000430          | 0.0003265            | 0.0000400          |
| 17      | 0.0007981            | 0.0000290          | 0.0003724            | 0.0000220          | 0.0012959            | 0.0000430          | 0.0003695            | 0.0000400          |
| 18      | 0.0009352            | 0.0000290          | 0.0004014            | 0.0000220          | 0.0014849            | 0.0000430          | 0.0004125            | 0.0000400          |
| 19      | 0.0010662            | 0.0000290          | 0.0004184            | 0.0000220          | 0.0016609            | 0.0000430          | 0.0004565            | 0.0000400          |
| 20      | 0.0012011            | 0.0000500          | 0.0004274            | 0.0000400          | 0.0018219            | 0.0001600          | 0.0004719            | 0.0001620          |
| 21      | 0.0013301            | 0.0000500          | 0.0004454            | 0.0000400          | 0.0020149            | 0.0001600          | 0.0005269            | 0.0001620          |
| 22      | 0.0014111            | 0.0000500          | 0.0004614            | 0.0000400          | 0.0021589            | 0.0001600          | 0.0005819            | 0.0001620          |
| 23      | 0.0014271            | 0.0000500          | 0.0004734            | 0.0000400          | 0.0022259            | 0.0001600          | 0.0006329            | 0.0001620          |
| 24      | 0.0013941            | 0.0000500          | 0.0004834            | 0.0000400          | 0.0022319            | 0.0001600          | 0.0006789            | 0.0001620          |
| 25      | 0.0013451            | 0.0000500          | 0.0004934            | 0.0000400          | 0.0022149            | 0.0001600          | 0.0007269            | 0.0001620          |
| 26      | 0.0013061            | 0.0000500          | 0.0005054            | 0.0000400          | 0.0022079            | 0.0001600          | 0.0007789            | 0.0001620          |
| 27      | 0.0012781            | 0.0000500          | 0.0005184            | 0.0000400          | 0.0022119            | 0.0001600          | 0.0008269            | 0.0001620          |
| 28      | 0.0012721            | 0.0000500          | 0.0005344            | 0.0000400          | 0.0022419            | 0.0001600          | 0.0008739            | 0.0001620          |
| 29      | 0.0012851            | 0.0000500          | 0.0005534            | 0.0000400          | 0.0022979            | 0.0001600          | 0.0009239            | 0.0001620          |
| 30      | 0.0012843            | 0.0001090          | 0.0005639            | 0.0000750          | 0.0022439            | 0.0005518          | 0.0008845            | 0.0003699          |
| 31      | 0.0013083            | 0.0001090          | 0.0005979            | 0.0000750          | 0.0023159            | 0.0005518          | 0.0009555            | 0.0003699          |
| 32      | 0.0013423            | 0.0001090          | 0.0006379            | 0.0000750          | 0.0024339            | 0.0005518          | 0.0010475            | 0.0003699          |
| 33      | 0.0013823            | 0.0001090          | 0.0006839            | 0.0000750          | 0.0024799            | 0.0005518          | 0.0011495            | 0.0003699          |
| 34      | 0.0014323            | 0.0001090          | 0.0007349            | 0.0000750          | 0.0025669            | 0.0005518          | 0.0012655            | 0.0003699          |
| 35      | 0.0014923            | 0.0001090          | 0.0007899            | 0.0000750          | 0.0026659            | 0.0005518          | 0.0013915            | 0.0003699          |
| 36      | 0.0015703            | 0.0001090          | 0.0008539            | 0.0000750          | 0.0027879            | 0.0005518          | 0.0015255            | 0.0003699          |
| 37      | 0.0016713            | 0.0001090          | 0.0009279            | 0.0000750          | 0.0029379            | 0.0005518          | 0.0016655            | 0.0003699          |
| 38      | 0.0018003            | 0.0001090          | 0.0010179            | 0.0000750          | 0.0031250            | 0.0005518          | 0.0018145            | 0.0003699          |
| 39      | 0.0019593            | 0.0001090          | 0.0011219            | 0.0000750          | 0.0033510            | 0.0005518          | 0.0019765            | 0.0003699          |
| 40      | 0.0020757            | 0.0002210          | 0.0011959            | 0.0001430          | 0.0032955            | 0.0010694          | 0.0019634            | 0.0006608          |

| Age (x) | White Men            |                    | White Women          |                    | Black Men            |                    | Black Women          |                    |
|---------|----------------------|--------------------|----------------------|--------------------|----------------------|--------------------|----------------------|--------------------|
|         | Q <sub>noCKD,x</sub> | I <sub>CKD,x</sub> |
| 41      | 0.0022677            | 0.0002210          | 0.0013169            | 0.0001430          | 0.0035766            | 0.0010694          | 0.0021494            | 0.0006608          |
| 42      | 0.0024887            | 0.0002210          | 0.0014539            | 0.0001430          | 0.0039037            | 0.0010694          | 0.0023804            | 0.0006608          |
| 43      | 0.0027367            | 0.0002210          | 0.0016089            | 0.0001430          | 0.0042838            | 0.0010694          | 0.0026645            | 0.0006608          |
| 44      | 0.0030028            | 0.0002210          | 0.0017739            | 0.0001430          | 0.0047099            | 0.0010694          | 0.0029905            | 0.0006608          |
| 45      | 0.0032768            | 0.0002210          | 0.0019449            | 0.0001430          | 0.0051490            | 0.0010694          | 0.0033276            | 0.0006608          |
| 46      | 0.0035598            | 0.0002210          | 0.0021189            | 0.0001430          | 0.0056211            | 0.0010694          | 0.0036676            | 0.0006608          |
| 47      | 0.0038708            | 0.0002210          | 0.0022980            | 0.0001430          | 0.0061942            | 0.0010694          | 0.0040277            | 0.0006608          |
| 48      | 0.0042218            | 0.0002210          | 0.0024860            | 0.0001430          | 0.0069074            | 0.0010694          | 0.0044147            | 0.0006608          |
| 49      | 0.0046148            | 0.0002210          | 0.0026880            | 0.0001430          | 0.0077506            | 0.0010694          | 0.0048308            | 0.0006608          |
| 50      | 0.0048904            | 0.0004709          | 0.0028139            | 0.0003080          | 0.0079119            | 0.0021138          | 0.0048265            | 0.0013391          |
| 51      | 0.0053435            | 0.0004709          | 0.0030559            | 0.0003080          | 0.0088885            | 0.0021138          | 0.0053017            | 0.0013391          |
| 52      | 0.0058056            | 0.0004709          | 0.0033100            | 0.0003080          | 0.0098801            | 0.0021138          | 0.0057719            | 0.0013391          |
| 53      | 0.0062636            | 0.0004709          | 0.0035730            | 0.0003080          | 0.0108397            | 0.0021138          | 0.0062140            | 0.0013391          |
| 54      | 0.0067247            | 0.0004709          | 0.0038520            | 0.0003080          | 0.0117723            | 0.0021138          | 0.0066382            | 0.0013391          |
| 55      | 0.0072107            | 0.0004709          | 0.0041480            | 0.0003080          | 0.0127629            | 0.0021138          | 0.0070804            | 0.0013391          |
| 56      | 0.0077438            | 0.0004709          | 0.0044801            | 0.0003080          | 0.0138246            | 0.0021138          | 0.0075636            | 0.0013391          |
| 57      | 0.0083299            | 0.0004709          | 0.0048681            | 0.0003080          | 0.0148852            | 0.0021138          | 0.0080828            | 0.0013391          |
| 58      | 0.0089880            | 0.0004709          | 0.0053261            | 0.0003080          | 0.0159489            | 0.0021138          | 0.0086620            | 0.0013391          |
| 59      | 0.0097200            | 0.0004709          | 0.0058552            | 0.0003080          | 0.0170616            | 0.0021138          | 0.0093242            | 0.0013391          |
| 60      | 0.0102937            | 0.0007837          | 0.0062777            | 0.0005678          | 0.0173695            | 0.0030025          | 0.0093539            | 0.0022525          |
| 61      | 0.0111789            | 0.0007837          | 0.0069308            | 0.0005678          | 0.0187840            | 0.0030025          | 0.0102305            | 0.0022525          |
| 62      | 0.0121322            | 0.0007837          | 0.0076209            | 0.0005678          | 0.0203107            | 0.0030025          | 0.0112013            | 0.0022525          |
| 63      | 0.0131634            | 0.0007837          | 0.0083430            | 0.0005678          | 0.0218695            | 0.0030025          | 0.0122140            | 0.0022525          |
| 64      | 0.0143047            | 0.0007837          | 0.0091252            | 0.0005678          | 0.0234202            | 0.0030025          | 0.0132488            | 0.0022525          |
| 65      | 0.0153740            | 0.0011154          | 0.0098788            | 0.0007277          | 0.0240987            | 0.0037031          | 0.0135434            | 0.0029825          |
| 66      | 0.0167695            | 0.0011154          | 0.0108270            | 0.0007277          | 0.0257413            | 0.0037031          | 0.0146257            | 0.0029825          |
| 67      | 0.0183081            | 0.0011154          | 0.0118653            | 0.0007277          | 0.0275712            | 0.0037031          | 0.0158221            | 0.0029825          |
| 68      | 0.0199507            | 0.0011154          | 0.0129736            | 0.0007277          | 0.0296245            | 0.0037031          | 0.0171537            | 0.0029825          |
| 69      | 0.0217484            | 0.0011154          | 0.0142019            | 0.0007277          | 0.0319061            | 0.0037031          | 0.0186504            | 0.0029825          |
| 70      | 0.0232609            | 0.0016556          | 0.0153536            | 0.0009745          | 0.0337050            | 0.0041713          | 0.0194818            | 0.0033135          |
| 71      | 0.0256415            | 0.0016556          | 0.0170423            | 0.0009745          | 0.0364342            | 0.0041713          | 0.0213778            | 0.0033135          |
| 72      | 0.0284253            | 0.0016556          | 0.0190241            | 0.0009745          | 0.0395673            | 0.0041713          | 0.0235804            | 0.0033135          |
| 73      | 0.0316244            | 0.0016556          | 0.0213130            | 0.0009745          | 0.0431313            | 0.0041713          | 0.0261125            | 0.0033135          |
| 74      | 0.0352017            | 0.0016556          | 0.0239160            | 0.0009745          | 0.0470539            | 0.0041713          | 0.0289521            | 0.0033135          |
| 75      | 0.0391683            | 0.0016556          | 0.0268672            | 0.0009745          | 0.0512532            | 0.0041713          | 0.0320841            | 0.0033135          |
| 76      | 0.0434211            | 0.0016556          | 0.0300795            | 0.0009745          | 0.0554344            | 0.0041713          | 0.0353304            | 0.0033135          |
| 77      | 0.0480982            | 0.0016556          | 0.0336529            | 0.0009745          | 0.0599112            | 0.0041713          | 0.0388622            | 0.0033135          |
| 78      | 0.0532375            | 0.0016556          | 0.0376245            | 0.0009745          | 0.0647017            | 0.0041713          | 0.0427034            | 0.0033135          |
| 79      | 0.0588773            | 0.0016556          | 0.0420322            | 0.0009745          | 0.0698248            | 0.0041713          | 0.0468762            | 0.0033135          |
| 80      | 0.0644873            | 0.0021966          | 0.0468010            | 0.0010554          | 0.0746845            | 0.0042211          | 0.0511578            | 0.0032128          |
| 81      | 0.0712579            | 0.0021966          | 0.0522185            | 0.0010554          | 0.0805302            | 0.0042211          | 0.0560746            | 0.0032128          |
| 82      | 0.0786592            | 0.0021966          | 0.0582123            | 0.0010554          | 0.0867648            | 0.0042211          | 0.0614031            | 0.0032128          |

| Age (x) | White Men            |                    | White Women          |                    | Black Men            |                    | Black Women          |                    |
|---------|----------------------|--------------------|----------------------|--------------------|----------------------|--------------------|----------------------|--------------------|
|         | Q <sub>noCKD,x</sub> | I <sub>CKD,x</sub> |
| 83      | 0.0867392            | 0.0021966          | 0.0648364            | 0.0010554          | 0.0934074            | 0.0042211          | 0.0671734            | 0.0032128          |
| 84      | 0.0955440            | 0.0021966          | 0.0721439            | 0.0010554          | 0.1004792            | 0.0042211          | 0.0734157            | 0.0032128          |
| 85      | 0.1050568            | 0.0018922          | 0.0804131            | 0.0006378          | 0.1077722            | 0.0039313          | 0.0807383            | 0.0024011          |
| 86      | 0.1154526            | 0.0018922          | 0.0892633            | 0.0006378          | 0.1157583            | 0.0039313          | 0.0880142            | 0.0024011          |
| 87      | 0.1267135            | 0.0018922          | 0.0989738            | 0.0006378          | 0.1242309            | 0.0039313          | 0.0958560            | 0.0024011          |
| 88      | 0.1388834            | 0.0018922          | 0.1096076            | 0.0006378          | 0.1332048            | 0.0039313          | 0.1042938            | 0.0024011          |
| 89      | 0.1520005            | 0.0018922          | 0.1212209            | 0.0006378          | 0.1426992            | 0.0039313          | 0.1133606            | 0.0024011          |
| 90      | 0.1661018            | 0.0018922          | 0.1338735            | 0.0006378          | 0.1527282            | 0.0039313          | 0.1230876            | 0.0024011          |
