# Supplementary material
Source: PubMed Central journal article supplement (PMC3723711)
Supplement: NIHMS466870-supplement-08.pdf [file NIHMS466870-supplement-08.pdf]

**Table S5: Sex- and race-adjusted hazard ratios of mortality associated with CKD, by age group\***

| eGFR range | Age Group | ACR<10 | ACR 10-29 | ACR 30-299 | ACR >300 |
|------------|-----------|--------|-----------|------------|----------|
| 45-59      | 18-54     | 2.67   | 4.79      | 10.04      | 10.78    |
| 30-44      | 18-54     | 7.90   | 14.14     | 12.62      | 17.68    |
| 15-29      | 18-54     | 11.62  | 16.50     | 18.72      | 19.95    |
| 45-59      | 55-64     | 1.30   | 2.49      | 3.28       | 5.34     |
| 30-44      | 55-64     | 2.94   | 3.88      | 7.11       | 6.80     |
| 15-29      | 55-64     | 6.47   | 6.02      | 8.16       | 11.68    |
| 45-59      | 65-74     | 1.19   | 1.95      | 2.97       | 4.31     |
| 30-44      | 65-74     | 1.99   | 3.33      | 4.90       | 6.06     |
| 15-29      | 65-74     | 4.16   | 4.40      | 6.71       | 7.15     |
| 45-59      | 75+       | 1.30   | 1.93      | 2.06       | 3.40     |
| 30-44      | 75+       | 1.91   | 2.78      | 3.06       | 4.03     |
| 15-29      | 75+       | 3.95   | 3.92      | 4.75       | 5.61     |

\*Reference category: eGFR 90-104, ACR<10 within each age group
