# Supplementary material
Source: PubMed Central journal article supplement (PMC3723711)
Supplement: NIHMS466870-supplement-09.pdf [file NIHMS466870-supplement-09.pdf]

## Item S1. State transition probability formulas.

### A. One-year probability of death among people of age x without CKD ( $Q_{\text{noCKD},x}$ ):

$$Q_{\text{noCKD},x} = M_x / [1 + P_{\text{CKD},x} * (HR_{\text{CKD},x} - 1)]$$

#### Source:

| Variable            | Definition                                                                                                                     | Source           |
|---------------------|--------------------------------------------------------------------------------------------------------------------------------|------------------|
| $M_x$               | One-year probability of death among the entire population of age x                                                             | Vital statistics |
| $P_{\text{CKD},x}$  | Prevalence of CKD at age x                                                                                                     | NHANES           |
| $HR_{\text{CKD},x}$ | Sex- and race-adjusted hazard ratio for mortality associated with CKD for persons of age x (compared with eGFR 90-104, ACR<10) | CKD-PC           |

#### Nomenclature:

- $d_{\text{population},x}$ : number of deaths in population (total, CKD, or no CKD) of age x to age x+1  
 $Q_{\text{population},x}$ : one-year probability of death in population (total, CKD, or no CKD) of age x  
 $N_{\text{population},x}$ : number alive in population (total, CKD, or no CKD) of age x to age x+1

#### Algebra:

1. Define  $d_{\text{total},x} = d_{\text{CKD},x} + d_{\text{noCKD},x}$ 
  - a.  $d_{\text{total},x} = Q_{\text{total},x} * N_{\text{total},x}$
  - b.  $d_{\text{CKD},x} = Q_{\text{CKD},x} * N_{\text{CKD},x}$
  - c.  $d_{\text{noCKD},x} = Q_{\text{noCKD},x} * N_{\text{noCKD},x}$
2. Substituting 1a-1c,  $Q_{\text{total},x} * N_{\text{total},x} = Q_{\text{CKD},x} * N_{\text{CKD},x} + Q_{\text{noCKD},x} * N_{\text{noCKD},x}$ 
  - a.  $N_{\text{CKD},x} = P_{\text{CKD},x} * N_{\text{total},x}$
  - b.  $N_{\text{noCKD},x} = P_{\text{noCKD},x} * N_{\text{total},x}$
  - c.  $P_{\text{CKD},x} = 1 - P_{\text{noCKD},x}$
  - d.  $Q_{\text{CKD},x} = Q_{\text{noCKD},x} * HR_{\text{CKD},x}$
3. Substituting 2a-2d,  $Q_{\text{total},x} * N_{\text{total},x} = Q_{\text{noCKD},x} * HR_{\text{CKD},x} * P_{\text{CKD},x} * N_{\text{total},x} + Q_{\text{noCKD},x} * P_{\text{noCKD},x} * N_{\text{total},x}$
4. Solving for  $Q_{\text{noCKD},x} = Q_{\text{total},x} / (HR_{\text{CKD},x} * P_{\text{CKD},x} + P_{\text{noCKD},x})$ 
  - a.  $P_{\text{noCKD},x} = 1 - P_{\text{CKD},x}$
  - b.  $Q_{\text{total},x} = M_x$
5. Substituting 4a-4b,  $Q_{\text{noCKD},x} = M_x / [1 + P_{\text{CKD},x} * (HR_{\text{CKD},x} - 1)]$

\*Intuition: if  $HR_{\text{CKD},x} = 1$ , then  $Q_{\text{noCKD},x} = M_x$

\*\*Assumption: HR is modeled appropriately by age, sex, and race (see eTable2)

\*\*\*Equation is presented as a single CKD category with a single  $HR_{\text{CKD}}$ . For models with more than one category of CKD, the equations would reflect the prevalence-weighted HRs associated with CKD. For example, for a two CKD category model, #4 is calculated as:

$$Q_{\text{noCKD},x} = Q_{\text{total},x} / (HR_{\text{CKD}1,x} * P_{\text{CKD}1,x} + HR_{\text{CKD}2,x} * P_{\text{CKD}2,x} + P_{\text{noCKD},x})$$

B. One-year probability of developing CKD among people of age x without CKD ( $I_{CKD,x}$ ):

$$I_{CKD,x} = (P_{CKD,x+1} - P_{CKD,x}) / (1 - P_{CKD,x}) + M_x * [(P_{noCKD,x+1} / P_{noCKD,x}) - (Q_{noCKD,x} / M_x)]$$

Source:

| Variable      | Definition                                                         | Source           |
|---------------|--------------------------------------------------------------------|------------------|
| $M_x$         | One-year probability of death among the entire population of age x | Vital statistics |
| $Q_{noCKD,x}$ | One-year probability of death among those without CKD at age x     | Previous step    |
| $P_{CKD,x}$   | Prevalence of CKD at age x                                         | NHANES           |

Nomenclature:

$Q_{population,x}$ : one-year probability of death in population (total, CKD, or no CKD) of age x  
 $N_{population,x}$ : number alive in population (total, CKD, or no CKD) of age x to age x+1

Algebra:

1. Define  $N_{noCKD,x+1} = N_{noCKD,x} - (N_{noCKD,x} * Q_{noCKD,x}) - (N_{noCKD,x} * I_{CKD,x})$ 
  - a. i.e., the number alive without CKD at age x+1 is the number alive without CKD at age x, less the number who died during the year, less the number who developed CKD during the year
2. Solve for  $I_{CKD,x} = (N_{noCKD,x} - (N_{noCKD,x} * Q_{noCKD,x}) - N_{noCKD,x+1}) / N_{noCKD,x}$
3. Simplifying,  $I_{CKD,x} = 1 - Q_{noCKD,x} - (N_{noCKD,x+1} / N_{noCKD,x})$ 
  - a.  $N_{noCKD,x} = N_{total,x} * P_{noCKD,x}$
  - b.  $N_{noCKD,x+1} = N_{total,x+1} * P_{noCKD,x+1}$
4. Substituting 3a-3b,  $I_{CKD,x} = 1 - Q_{noCKD,x} - (N_{total,x+1} * P_{noCKD,x+1} / N_{total,x} * P_{noCKD,x})$ 
  - a.  $N_{total,x+1} = N_{total,x} - N_{total,x} * Q_{total,x}$
5. Substituting 4a,  $I_{CKD,x} = 1 - Q_{noCKD,x} - [(N_{total,x} - N_{total,x} * Q_{total,x}) * P_{noCKD,x+1}] / (N_{total,x} * P_{noCKD,x})$
6. Simplifying,  $I_{CKD,x} = 1 - Q_{noCKD,x} - [(1 - Q_{total,x}) * (P_{noCKD,x+1} / P_{noCKD,x})]$
7. Rearranging,  $I_{CKD,x} = 1 - (P_{noCKD,x+1} / P_{noCKD,x}) + (Q_{total,x} * P_{noCKD,x+1} / P_{noCKD,x}) - Q_{noCKD,x}$ 
  - a.  $P_{noCKD,x} = 1 - P_{CKD,x}$
  - b.  $P_{noCKD,x+1} = 1 - P_{CKD,x+1}$
  - c.  $Q_{total,x} = M_x$
8. Substituting 7a-7c,
 
$$I_{CKD,x} = (P_{CKD,x+1} - P_{CKD,x}) / (1 - P_{CKD,x}) + M_x * [(P_{noCKD,x+1} / P_{noCKD,x}) - (Q_{noCKD,x} / M_x)]$$

\*Intuition: as  $M_x$  approaches 0, then  $I_{CKD,x} = (P_{CKD,x+1} - P_{CKD,x}) / (P_{noCKD,x})$

\*\*Assumption: Population steady state (since  $N_{x+1}$  is derived from  $N_x$  in previous year)
