# Supplementary material
Source: PubMed Central journal article supplement (PMC3723711)

**Figure S1. Actual versus predicted U.S. prevalence of CKD Stage 3a+, by age, sex, and race.**

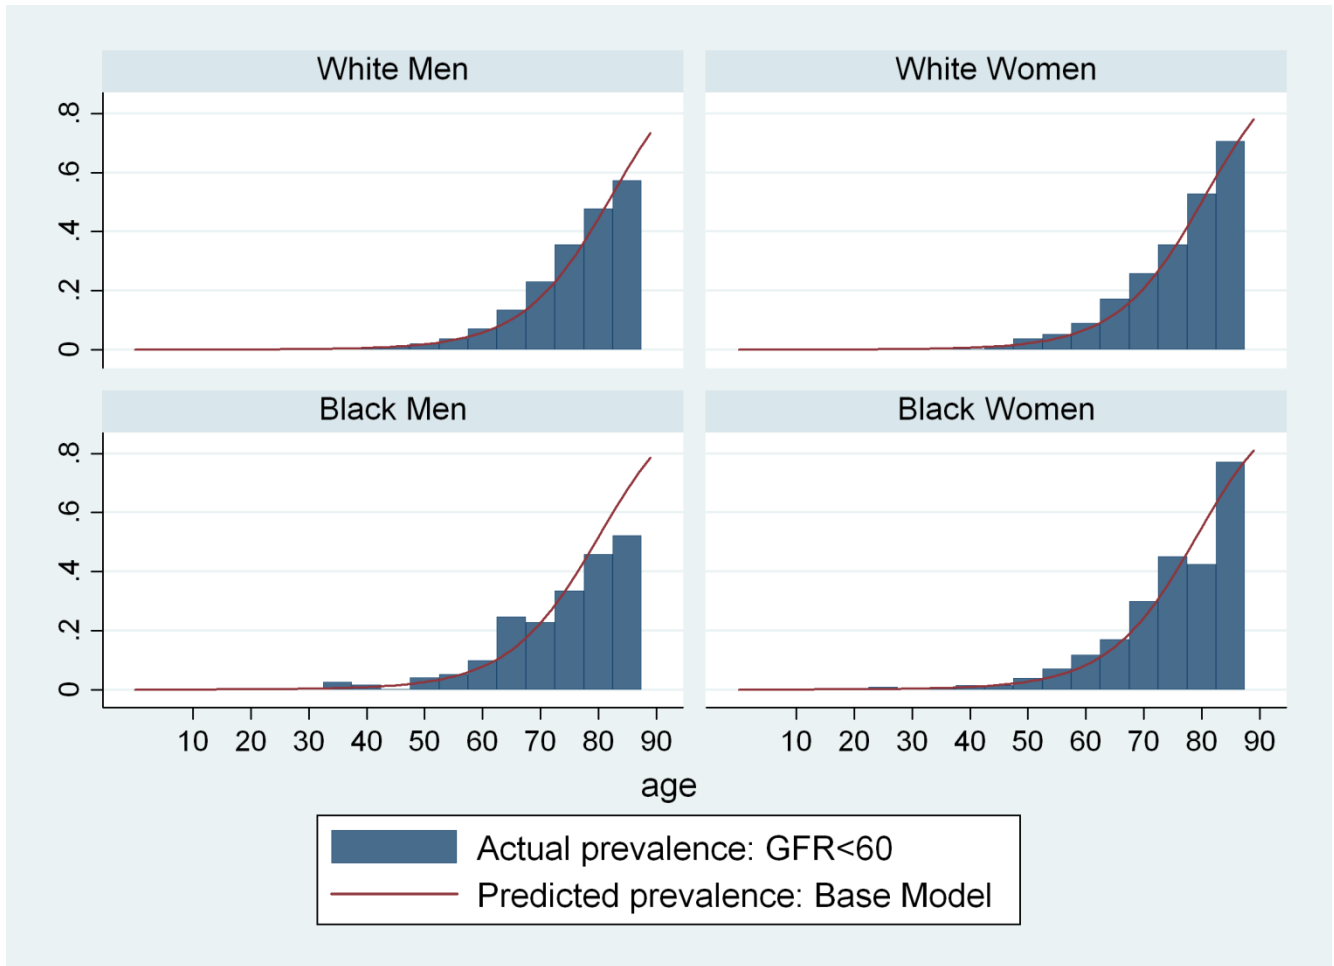

Supplement: NIHMS466870-supplement-01.pdf [file NIHMS466870-supplement-01.pdf]

**Figure S2. CKD Stage 4+ projections by age, race, and sex, scaled by estimated 2012 U.S. population**

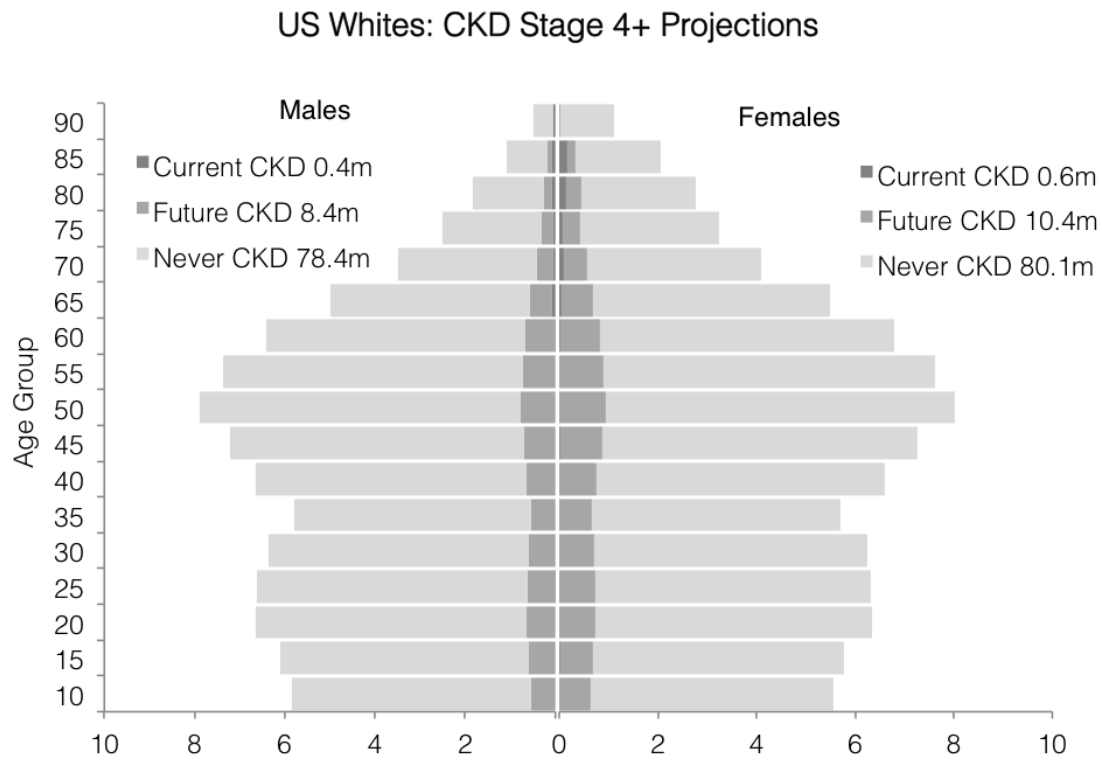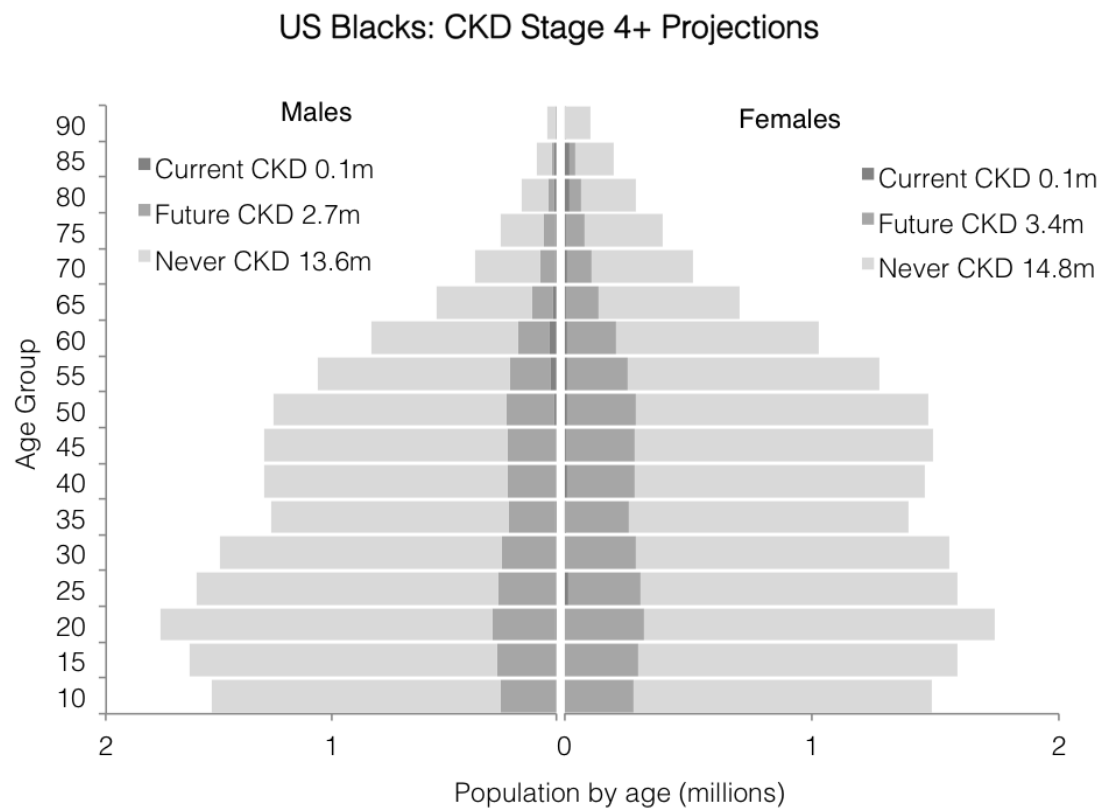

Supplement: NIHMS466870-supplement-02.pdf [file NIHMS466870-supplement-02.pdf]

**Figure S3.** ESRD projections by age, race, and sex, scaled by estimated 2012 U.S. population

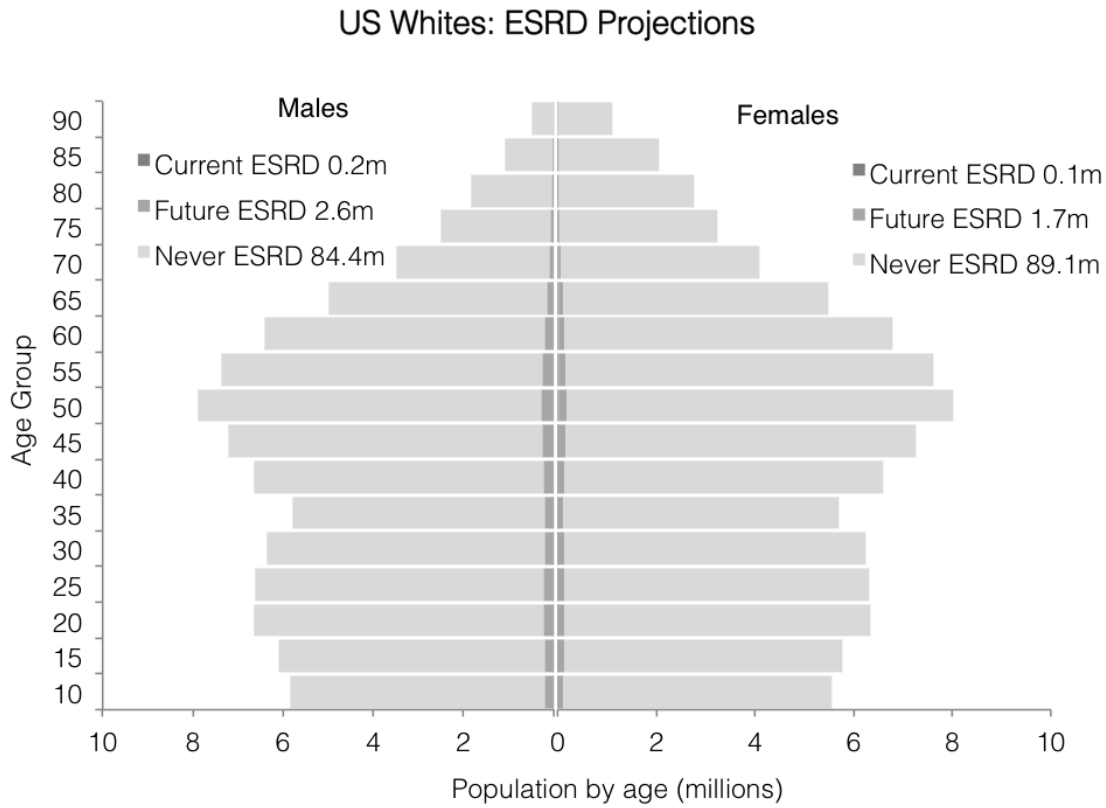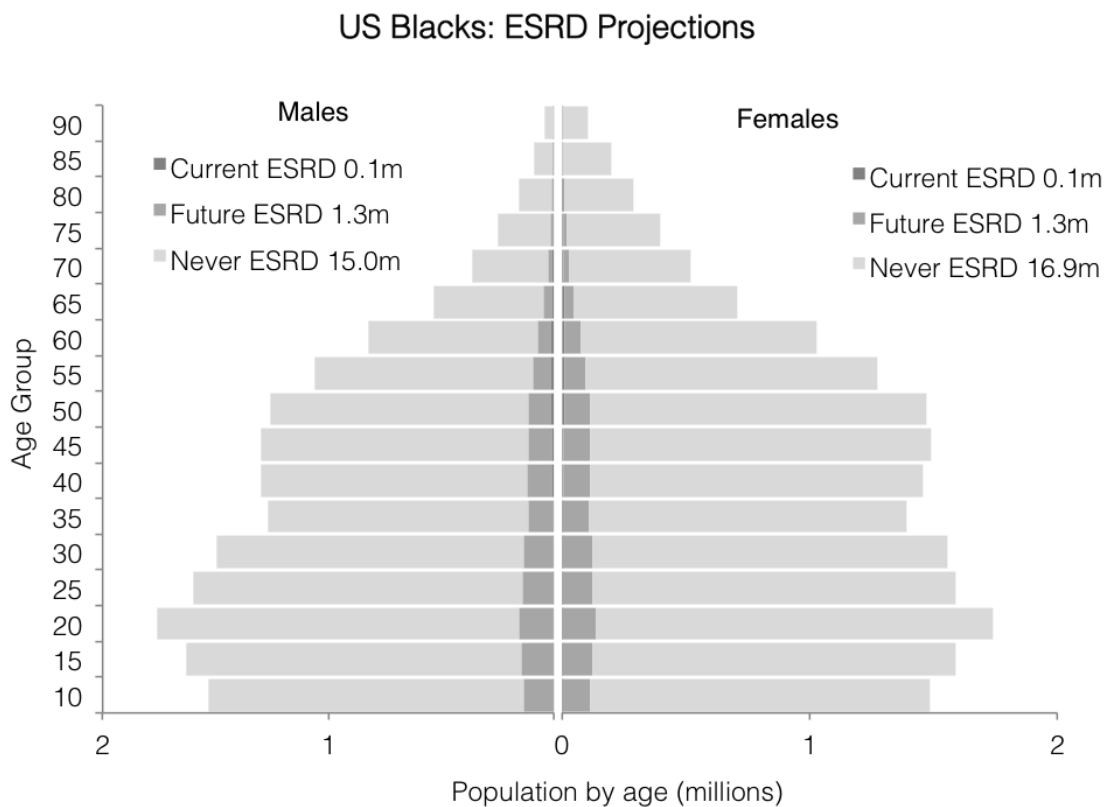

Supplement: NIHMS466870-supplement-03.pdf [file NIHMS466870-supplement-03.pdf]
